# Supplementary material for: Synthesis and single crystal X-ray structure of the first imido analog of an eight-membered aluminophosphinate heterocycleElectronic supplementary data (ESI) available: preparation and spectroscopic data of 1, crystallographic data of 1, xyz-coordinates and absolute energies of all computed species. See http://www.rsc.org/suppdata/cc/b2/b203590a/
Source: Royal Society of Chemistry journal article supplement (doi:10.1039/b203590a), 2002-05-31
Supplement: b203590a.doc [file b203590a.doc]

**Supplementary data**

**Chem. Commun**

Synthesis and single crystal X-ray structure of the first imido analog of an eight-membered aluminophosphate heterocycle

Stephan Schulz, Tillmann Bauer, Martin Nieger and Ingo Krossing

**1**: Et2AlH (0.17 g, 2 mmol) was added dropwise at -78 °C to a solution of *t*-BuP(NH2)2 (0.24 g, 2 mmol) in 40 mL of pentane. Slow warming to ambient temperature within 3 h occured with gas evolution. The resulting colorless solution was stored at -20 °C, to give colorless crystals. M.p. 54 °C (dec.); yield 0.30 g (73%); elemental analysis C16H44Al2N4P2 (M = 408.46) calc. (found): C: 47.0 (46.8); H: 10.9 (10.6); 1H NMR (C6D6, 25°C)  0.09 - 0.29 (m, 3JHH = 8.1 Hz, 8H, *CH*2CH3), 0.66 (d, 3JPH = 7.0 Hz, 18H, *t*-Bu), 0.93 (s (br), 4H, NH), 1.45 (t, 3JHH = 8.1 Hz, 12H, CH2*CH*3), 6.26 (dt, 1JPH = 493 Hz, 3JHH = 7.7 Hz, 2H, PH); 13C NMR (C6D6, 30 °C)  1.3 (s, *C*H2CH3), 10.5 (s, CH2*C*H3), 23.3 (d, 2JPC = 2.6 Hz, (*C*H3)3CP), 30.8 (d, 1JPC = 74.4 Hz, (CH3)3*C*P); 31P NMR (C6D6, 30 °C)  46.7 (d, 1JPH = 493 Hz); EI-MS (16 eV, 50 °C) m/z (%): 57 (10) *t-*Bu+, 265 (40) [M - 2(*t*-Bu) -Et]+, 291 (3) [M - 2(*t*-Bu) -H2]+, 319 (15) [M - *t*-Bu - EtH - H2]+, 349 (100) [M - *t*-Bu -H2]+, 379 (15) [M - Et]+. IR (nujol, KBr plates)  3358 (NH), 2376 (PH), 1132, 1041, 979, 945, 615 cm-1.

Crystal data for **1**: Data were collected on a Nonius Kappa-CCD diffractometer using Mo-K radiation ( = 0.71073 Å). The structure was solved by direct methods (SHELXS-97)1 and refined by full-matrix least-squares on F2. All non-hydrogen atoms were refined anisotropically and hydrogen atoms by a riding model (SHELXL-97).2

[1] G. M. Sheldrick SHELXS-90/96, Program for Structure Solution, *Acta Crystallogr. Sect. A* 1990, **46**, 467.

[2] G. M. Sheldrick SHELXL-97, Program for Crystal Structure Refinement, Universität Göttingen, 1997.

Table 1. Crystal data and structure refinement for **1**.

| Empirical formula | C16 H44 Al2 N4 P2 |
| --- | --- |
| Formula weight | 408.45 |
| Temperature | 123(2) K |
| Crystal system, space group | Monoclinic, P2(1)/c (No.14) |
| Unit cell dimensions | a = 11.5332(6) Å alpha = 90 deg. |
|  | b = 9.4303(5) Å beta = 109.501(2) deg. |
|  | c = 12.2830(8) Å gamma = 90 deg. |
| Volume | 1259.28(12) Å 3 |
| Z, Calculated density | 2, 1.077 Mg/m3 |
| Absorption coefficient | 0.249 mm-1 |
| F(000) | 448 |
| Crystal size | 0.40 x 0.30 x 0.15 mm |
| Theta range for data collection | 2.79 to 25.00 deg. |
| Limiting indices | -13<=h<=13, -11<=k<=10, -14<=l<=12 |
| Reflections collected / unique | 5688 / 2221 [R(int) = 0.0274] |
| Completeness to theta = 25.00 | 99.8 % |
| Absorption correction | None |
| Data / restraints / parameters | 2221 / 9 / 117 |
| Goodness-of-fit on F2 | 1.045 |
| Final R indices [I>2sigma(I)] | R1 = 0.0351, wR2 = 0.0908 |
| R indices (all data) | R1 = 0.0486, wR2 = 0.0954 |
| Largest diff. peak and hole | 0.413 and -0.308 e. Å-3 |

Table 2. Atomic coordinates ( x 10^4) and equivalent isotropic displacement parameters (Å2 x 103) for **1**. U(eq) is defined as one third of the trace of the orthogonalized Uij tensor.

|  | x | y | z | U(eq) |
| --- | --- | --- | --- | --- |
| P(1) | 1686(1) | 6294(1) | 5680(1) | 23(1) |
| H(1P) | 1736(17) | 6678(18) | 4618(13) | 28 |
| Al(1) | 1000(1) | 3508(1) | 4204(1) | 22(1) |
| N(1) | 1501(2) | 4603(2) | 5577(1) | 24(1) |
| H(1N) | 1481(19) | 4240(20) | 6182(15) | 29 |
| N(2) | 628(2) | 7091(2) | 6015(2) | 27(1) |
| H(2N) | 807(19) | 7878(18) | 6253(18) | 33 |
| C(1) | 3208(2) | 6842(2) | 6610(2) | 29(1) |
| C(2) | 3366(2) | 8430(2) | 6419(2) | 39(1) |
| C(3) | 4155(2) | 5987(2) | 6266(2) | 47(1) |
| C(4) | 3330(2) | 6564(3) | 7878(2) | 50(1) |
| C(5) | 987(2) | 4756(2) | 2899(2) | 31(1) |
| C(6) | 540(3) | 3952(2) | 1746(2) | 45(1) |
| C(7) | 2040(2) | 1802(2) | 4362(2) | 35(1) |
| C(8) | 3336(3) | 2131(4) | 4338(4) | 43(1) a) |
| C(8') | 3370(5) | 1933(7) | 4961(7) | 43(1) b) |

a) s.o.f.= 0.61(1); b) s.o.f.= 0.39(1)

Table 3. Bond lengths [Å] and angles [deg] for **1**.

| P(1)-N(2) | 1.5993(17) | C(1)-P(1)-H(1P) | 100.6(8) |
| --- | --- | --- | --- |
| P(1)-N(1) | 1.6085(16) | N(2)#1-Al(1)-N(1) | 106.42(8) |
| P(1)-C(1) | 1.821(2) | N(2)#1-Al(1)-C(7) | 108.17(8) |
| P(1)-H(1P) | 1.374(14) | N(1)-Al(1)-C(7) | 111.15(9) |
| Al(1)-N(2)#1 | 1.8922(18) | N(2)#1-Al(1)-C(5) | 108.81(9) |
| Al(1)-N(1) | 1.8954(17) | N(1)-Al(1)-C(5) | 108.26(8) |
| Al(1)-C(7) | 1.977(2) | C(7)-Al(1)-C(5) | 113.76(9) |
| Al(1)-C(5) | 1.985(2) | P(1)-N(1)-Al(1) | 127.11(10) |
| N(1)-H(1N) | 0.826(15) | P(1)-N(1)-H(1N) | 112.6(15) |
| N(2)-Al(1)#1 | 1.8922(18) | Al(1)-N(1)-H(1N) | 118.9(15) |
| N(2)-H(2N) | 0.799(15) | P(1)-N(2)-Al(1)#1 | 129.00(10) |
| C(1)-C(3) | 1.526(3) | P(1)-N(2)-H(2N) | 113.9(15) |
| C(1)-C(2) | 1.536(3) | Al(1)#1-N(2)-H(2N) | 116.9(15) |
| C(1)-C(4) | 1.539(3) | C(3)-C(1)-C(2) | 109.91(18) |
| C(5)-C(6) | 1.536(3) | C(3)-C(1)-C(4) | 111.02(19) |
| C(7)-C(8') | 1.469(6) | C(2)-C(1)-C(4) | 110.18(18) |
| C(7)-C(8) | 1.537(4) | C(3)-C(1)-P(1) | 107.82(15) |
| N(2)-P(1)-N(1) | 113.21(9) | C(2)-C(1)-P(1) | 108.61(15) |
| N(2)-P(1)-C(1) | 111.34(9) | C(4)-C(1)-P(1) | 109.23(15) |
| N(1)-P(1)-C(1) | 113.91(9) | C(6)-C(5)-Al(1) | 111.21(14) |
| N(2)-P(1)-H(1P) | 113.5(8) | C(8')-C(7)-Al(1) | 118.6(3) |
| N(1)-P(1)-H(1P) | 103.5(7) | C(8)-C(7)-Al(1) | 113.31(19) |

Symmetry transformations used to generate equivalent atoms: #1 -x,-y+1,-z+1

Table 4. Torsion angles [deg] for **1**.

| N(2)-P(1)-N(1)-Al(1) | 107.04(13) |
| --- | --- |
| C(1)-P(1)-N(1)-Al(1) | -124.40(12) |
| N(2)#1-Al(1)-N(1)-P(1) | -107.93(13) |
| C(7)-Al(1)-N(1)-P(1) | 134.52(13) |
| C(5)-Al(1)-N(1)-P(1) | 8.89(16) |
| N(1)-P(1)-N(2)-Al(1)#1 | -23.72(16) |
| C(1)-P(1)-N(2)-Al(1)#1 | -153.59(12) |
| N(2)-P(1)-C(1)-C(3) | 177.58(14) |
| N(1)-P(1)-C(1)-C(3) | 48.09(18) |
| N(2)-P(1)-C(1)-C(2) | -63.35(17) |
| N(1)-P(1)-C(1)-C(2) | 167.15(14) |
| N(2)-P(1)-C(1)-C(4) | 56.84(17) |
| N(1)-P(1)-C(1)-C(4) | -72.65(17) |
| N(2)#1-Al(1)-C(5)-C(6) | -62.55(18) |
| N(1)-Al(1)-C(5)-C(6) | -177.82(16) |
| C(7)-Al(1)-C(5)-C(6) | 58.10(19) |
| N(2)#1-Al(1)-C(7)-C(8') | -157.1(4) |
| N(1)-Al(1)-C(7)-C(8') | -40.6(4) |
| C(5)-Al(1)-C(7)-C(8') | 81.9(4) |
| N(2)#1-Al(1)-C(7)-C(8) | 170.1(2) |
| N(1)-Al(1)-C(7)-C(8) | -73.4(2) |
| C(5)-Al(1)-C(7)-C(8) | 49.1(2) |

Symmetry transformations used to generate equivalent atoms: #1 -x,-y+1,-z+1

**Computational details:** All computations were done with the program TURBOMOLE.[3] The geometries of all species were optimised at the BP86 level[4,5] with the split valence polarisation SVP basis set.[6]

[3] TURBOMOLE, Version 5: a) R. Ahlrichs, M. Bär, M. Häser, H. Horn, C. Kölmel, *Chem. Phys. Letters* **1989**, *162*, 165; b) M. v. Arnim, R. Ahlrichs, *J. Chem. Phys.* **1999**, *111*, 9183; c) O. Treutler, R. Ahlrichs, *J. Chem. Phys.* **1995**, *102*, 346; d) current version: http://www.chemie.uni-karlsruhe.de/PC/TheoChem.

[4] a) K. Eichkorn, F. Weigend, M. Häser, R. Ahlrichs, *Theor. Chim. Acta* **1997**, *97*, 331; b) K. Eichkorn, O. Treutler, H. Ohm, M. Häser, R. Ahlrichs, *Chem. Phys. Lett.* **1995**, *242*, 652.

[5] a) J. P. Perdew, *Phys. Rev. B* **1986**, *33*, 8822; b) A. D. Becke, *Phys. Rev. A* **1988**, *38*, 3098; c) S. H. Vosko, L. Wilk, M. Nusair, *J. Can. Phys.* **1980**, *58*, 1200.

[6] A. Schäfer, H. Horn, R. Ahlrichs, *J. Chem. Phys.*, **1992**, *97*, 2571.

Et2AlH

| **atom** | **charge** |  | **atom** | **charge** |
| --- | --- | --- | --- | --- |
| 1c | -0.2558 |  | 9h | 0.0436 |
| 2c | -0.2569 |  | 10h | -0.0852 |
| 3al | 0.4353 |  | 11h | 0.0348 |
| 4c | -0.1211 |  | 12h | 0.0376 |
| 5c | -0.1205 |  | 13h | 0.0414 |
| 6h | 0.0462 |  | 14h | 0.0343 |
| 7h | 0.0419 |  | 15h | 0.0389 |
| 8h | 0.0455 |  | 16h | 0.0401 |

|  | **x** | **y** | **z** |
| --- | --- | --- | --- |
| c1 | -1.7282 | -0.1339 | -0.6046 |
| c2 | 1.7169 | 0.0929 | -0.6128 |
| al3 | 0.0001 | -0.0714 | 0.3741 |
| c4 | -3.0067 | 0.1498 | 0.2108 |
| c5 | 3.0179 | 0.0252 | 0.2118 |
| h6 | -1.6638 | 0.5578 | -1.4801 |
| h7 | -1.7967 | -1.1498 | -1.0716 |
| h8 | 1.7261 | -0.6865 | -1.4156 |
| h9 | 1.6744 | 1.0557 | -1.1825 |
| h10 | 0.0054 | -0.1641 | 1.9888 |
| h11 | -3.9305 | 0.0722 | -0.4089 |
| h12 | -2.9989 | 1.1722 | 0.6523 |
| h13 | -3.1219 | -0.5620 | 1.0592 |
| h14 | 3.9282 | 0.1386 | -0.4222 |
| h15 | 3.1162 | -0.9437 | 0.7514 |
| h16 | 3.0593 | 0.8247 | 0.9860 |

tBuP(NH2)2:

| **atom** | **charge** |  | **atom** | **charge** |
| --- | --- | --- | --- | --- |
| 1c | -0.1489 |  | 11h | 0.0502 |
| c2 | -0.1492 |  | 12h | 0.0401 |
| c3 | -0.1574 |  | 13h | 0.0330 |
| c4 | -0.0156 |  | 14h | 0.0351 |
| 5p | 0.4733 |  | 15h | 0.0407 |
| 6n | -0.3791 |  | 16h | 0.0362 |
| 7n | -0.3786 |  | 17h | 0.0931 |
| 8h | 0.0504 |  | 18h | 0.1055 |
| 9h | 0.0329 |  | 19h | 0.1054 |
| 10h | 0.0398 |  | 20h | 0.0930 |

|  | **x** | **y** | **z** |
| --- | --- | --- | --- |
| c1 | 1.2541 | 0.5704 | 1.5898 |
| c2 | -1.2730 | 0.5379 | 1.5833 |
| c3 | 0.0198 | -1.5657 | 1.0588 |
| c4 | -0.0004 | -0.0312 | 0.9223 |
| p5 | -0.0002 | 0.5652 | -0.8930 |
| n6 | -1.4228 | -0.2679 | -1.4523 |
| n7 | 1.4227 | -0.2681 | -1.4517 |
| h8 | 2.1841 | 0.2048 | 1.1041 |
| h9 | 1.2860 | 0.2949 | 2.6700 |
| h10 | 1.2516 | 1.6819 | 1.5235 |
| h11 | -2.1912 | 0.1406 | 1.1003 |
| h12 | -1.3049 | 1.6485 | 1.5070 |
| h13 | -1.2970 | 0.2716 | 2.6661 |
| h14 | -0.8751 | -2.0419 | 0.5975 |
| h15 | 0.0154 | -1.8555 | 2.1362 |
| h16 | 0.9350 | -2.0151 | 0.6113 |
| h17 | -1.4574 | -1.2977 | -1.4235 |
| h18 | -1.7935 | 0.0814 | -2.3441 |
| h19 | 1.7970 | 0.0867 | -2.3398 |
| h20 | 1.4516 | -1.2981 | -1.4326 |

Compound E:

| **atom** | **charge** |  | **atom** | **charge** |  | **atom** | **charge** |
| --- | --- | --- | --- | --- | --- | --- | --- |
| 1p | 0.9916 |  | 13h | -0.0015 |  | 25h | 0.1485 |
| 2c | -0.0588 |  | 14h | 0.0596 |  | 26h | -0.1281 |
| 3c | -0.1535 |  | 15h | 0.0485 |  | 27h | 0.0128 |
| 4c | -0.1424 |  | 16h | 0.0503 |  | 28h | 0.0281 |
| 5c | -0.1486 |  | 17h | 0.0513 |  | 29h | 0.0274 |
| 6n | -0.7471 |  | 18h | 0.0576 |  | 30h | 0.0134 |
| 7n | -0.4265 |  | 19h | 0.0532 |  | 31h | 0.0177 |
| 8al | 0.4910 |  | 20h | 0.0505 |  | 32h | 0.0145 |
| 9c | -0.1371 |  | 21h | 0.0620 |  | 33h | 0.0330 |
| 10c | -0.2290 |  | 22h | 0.0493 |  | 34h | 0.0347 |
| 11c | -0.1307 |  | 23h | 0.1273 |  | 35h | 0.0010 |
| 12c | -0.2572 |  | 24h | 0.1259 |  | 36h | 0.0116 |

|  | **x** | **y** | **z** |
| --- | --- | --- | --- |
| p1 | -0.1272 | 1.1200 | 0.3340 |
| c2 | -0.1494 | 2.8311 | -0.4183 |
| c3 | 1.2582 | 3.4549 | -0.2791 |
| c4 | -0.5266 | 2.6771 | -1.9087 |
| c5 | -1.1965 | 3.6902 | 0.3228 |
| n6 | 0.7244 | 0.0358 | -0.5158 |
| n7 | 0.1426 | 1.3650 | 2.0063 |
| al8 | 0.6634 | -1.9565 | -0.1884 |
| c9 | -0.3342 | -4.2570 | -1.8829 |
| c10 | -0.3990 | -2.7244 | -1.7181 |
| c11 | -0.4323 | -3.5334 | 2.1480 |
| c12 | -0.1768 | -2.0901 | 1.6639 |
| h13 | -1.4696 | 0.6572 | 0.3844 |
| h14 | 1.2627 | 4.4591 | -0.7592 |
| h15 | 1.5505 | 3.6002 | 0.7846 |
| h16 | 2.0426 | 2.8468 | -0.7823 |
| h17 | -0.5598 | 3.6825 | -2.3861 |
| h18 | 0.2060 | 2.0529 | -2.4624 |
| h19 | -1.5287 | 2.2104 | -2.0332 |
| h20 | -1.2055 | 4.7153 | -0.1125 |
| h21 | -0.9716 | 3.7693 | 1.4069 |
| h22 | -2.2218 | 3.2719 | 0.2141 |
| h23 | 1.5992 | 0.3768 | -0.9376 |
| h24 | 1.1026 | 1.6586 | 2.2424 |
| h25 | -0.0863 | 0.5140 | 2.5489 |
| h26 | 2.2586 | -2.3233 | -0.2031 |
| h27 | -0.8888 | -4.6275 | -2.7800 |
| h28 | 0.7170 | -4.6137 | -1.9857 |
| h29 | -0.7635 | -4.7880 | -1.0019 |
| h30 | -1.4686 | -2.4052 | -1.6377 |
| h31 | -0.0263 | -2.2423 | -2.6567 |
| h32 | -0.8505 | -3.5893 | 3.1827 |
| h33 | 0.5071 | -4.1327 | 2.1472 |
| h34 | -1.1497 | -4.0647 | 1.4818 |
| h35 | -1.1469 | -1.5284 | 1.7141 |
| h36 | 0.5081 | -1.5876 | 2.3963 |

Compound F:

| **atom** | **charge** |  | **atom** | **charge** |  | **atom** | **charge** |
| --- | --- | --- | --- | --- | --- | --- | --- |
| 1p | 0.9673 |  | 13h | -0.1023 |  | 25h | 0.0225 |
| 2c | -0.0755 |  | 14h | 0.0467 |  | 26h | 0.0307 |
| 3c | -0.1631 |  | 15h | 0.0410 |  | 27h | 0.0308 |
| 4c | -0.1453 |  | 16h | 0.0493 |  | 28h | 0.0450 |
| 5c | -0.1467 |  | 17h | 0.0401 |  | 29h | 0.0436 |
| 6n | -0.3655 |  | 18h | 0.0522 |  | 30h | 0.0224 |
| 7n | -0.4340 |  | 19h | 0.0533 |  | 31h | 0.0304 |
| 8al | 0.2383 |  | 20h | 0.0428 |  | 32h | 0.0315 |
| 9c | -0.1322 |  | 21h | 0.0403 |  | 33h | 0.0418 |
| 10c | -0.2570 |  | 22h | 0.0595 |  | 34h | 0.0422 |
| 11c | -0.1314 |  | 23h | 0.1263 |  |  |  |
| 12c | -0.2554 |  | 24h | 0.1101 |  |  |  |

|  | **x** | **y** | **z** |
| --- | --- | --- | --- |
| p1 | -1.4809 | 0.5344 | -0.6488 |
| c2 | -2.6876 | -0.2003 | 0.5885 |
| c3 | -4.1284 | 0.0646 | 0.1084 |
| c4 | -2.4120 | -1.7121 | 0.6924 |
| c5 | -2.4304 | 0.4995 | 1.9381 |
| n6 | 0.0363 | 0.3106 | -0.3974 |
| n7 | -2.0168 | -0.0796 | -2.1648 |
| al8 | 1.7627 | 0.1211 | -0.0683 |
| c9 | 3.8249 | 0.0123 | 2.2093 |
| c10 | 2.3371 | 0.1687 | 1.8420 |
| c11 | 4.4690 | -0.3992 | -1.4217 |
| c12 | 2.9706 | -0.1137 | -1.6393 |
| h13 | -1.9086 | 1.9271 | -0.6256 |
| h14 | -4.8559 | -0.2789 | 0.8795 |
| h15 | -4.3197 | 1.1502 | -0.0603 |
| h16 | -4.3536 | -0.4859 | -0.8314 |
| h17 | -3.1075 | -2.1782 | 1.4278 |
| h18 | -2.5535 | -2.2142 | -0.2893 |
| h19 | -1.3710 | -1.9051 | 1.0313 |
| h20 | -3.1113 | 0.0872 | 2.7181 |
| h21 | -2.6178 | 1.5960 | 1.8780 |
| h22 | -1.3830 | 0.3489 | 2.2788 |
| h23 | -1.2444 | -0.1395 | -2.8412 |
| h24 | -2.8464 | 0.3623 | -2.5838 |
| h25 | 3.9972 | 0.0411 | 3.3117 |
| h26 | 4.2454 | -0.9510 | 1.8424 |
| h27 | 4.4492 | 0.8201 | 1.7654 |
| h28 | 1.9389 | 1.1263 | 2.2611 |
| h29 | 1.7339 | -0.6181 | 2.3601 |
| h30 | 5.0274 | -0.4998 | -2.3828 |
| h31 | 4.6345 | -1.3422 | -0.8529 |
| h32 | 4.9672 | 0.4110 | -0.8433 |
| h33 | 2.8483 | 0.8111 | -2.2573 |
| h34 | 2.5168 | -0.9180 | -2.2699 |

Compound G:

| **atom** | **charge** |  | **atom** | **charge** |  | **atom** | **charge** |
| --- | --- | --- | --- | --- | --- | --- | --- |
| 1p | 1.0004 |  | 13h | -0.0870 |  | 25h | 0.0174 |
| 2c | -0.0874 |  | 14h | 0.0513 |  | 26h | 0.0250 |
| 3c | -0.1586 |  | 15h | 0.0438 |  | 27h | 0.0319 |
| 4c | -0.1484 |  | 16h | 0.0519 |  | 28h | 0.0193 |
| 5c | -0.1534 |  | 17h | 0.0429 |  | 29h | 0.0266 |
| 6n | -0.5764 |  | 18h | 0.0626 |  | 30h | 0.0184 |
| 7n | -0.5375 |  | 19h | 0.0507 |  | 31h | 0.0190 |
| 8al | 0.6413 |  | 20h | 0.0505 |  | 32h | 0.0323 |
| 9c | -0.1363 |  | 21h | 0.0454 |  | 33h | 0.0218 |
| 10c | -0.2578 |  | 22h | 0.0445 |  | 34h | 0.0270 |
| 11c | -0.1367 |  | 23h | 0.1063 |  |  |  |
| 12c | -0.2543 |  | 24h | 0.1038 |  |  |  |

|  | **x** | **y** | **z** |
| --- | --- | --- | --- |
| p1 | -1.0920 | -0.7541 | -0.0251 |
| c2 | -2.7109 | 0.1733 | 0.1308 |
| c3 | -3.3110 | -0.1976 | 1.5026 |
| c4 | -2.4180 | 1.6829 | 0.0464 |
| c5 | -3.6380 | -0.2851 | -1.0135 |
| n6 | -0.1958 | -0.4305 | -1.3556 |
| n7 | 0.0755 | -0.3915 | 1.0710 |
| al8 | 1.4490 | -0.0306 | -0.3263 |
| c9 | 3.0751 | 2.4050 | 0.4741 |
| c10 | 1.9968 | 1.8842 | -0.4994 |
| c11 | 3.8594 | -1.5776 | 0.6917 |
| c12 | 2.8160 | -1.4878 | -0.4425 |
| h13 | -1.5729 | -2.1213 | 0.0907 |
| h14 | -4.2856 | 0.3230 | 1.6444 |
| h15 | -3.5037 | -1.2913 | 1.5937 |
| h16 | -2.6388 | 0.1101 | 2.3341 |
| h17 | -3.3620 | 2.2611 | 0.1685 |
| h18 | -1.7084 | 1.9975 | 0.8419 |
| h19 | -1.9691 | 1.9552 | -0.9331 |
| h20 | -4.6303 | 0.2128 | -0.9215 |
| h21 | -3.8163 | -1.3846 | -0.9934 |
| h22 | -3.2260 | -0.0177 | -2.0121 |
| h23 | -0.5923 | -0.2753 | -2.2852 |
| h24 | 0.1000 | -0.8566 | 1.9834 |
| h25 | 3.3191 | 3.4838 | 0.3170 |
| h26 | 2.7575 | 2.3024 | 1.5378 |
| h27 | 4.0319 | 1.8434 | 0.3716 |
| h28 | 2.3475 | 2.0447 | -1.5504 |
| h29 | 1.0784 | 2.5139 | -0.4073 |
| h30 | 4.5763 | -2.4235 | 0.5574 |
| h31 | 3.3799 | -1.7237 | 1.6880 |
| h32 | 4.4716 | -0.6499 | 0.7676 |
| h33 | 3.3504 | -1.3812 | -1.4198 |
| h34 | 2.2713 | -2.4608 | -0.5220 |

Compound H:

| **atom** | **charge** |  | **atom** | **charge** |  | **atom** | **charge** |
| --- | --- | --- | --- | --- | --- | --- | --- |
| 1p | 1.0312 |  | 24c | -0.1287 |  | 47c | -0.1591 |
| 2h | -0.0396 |  | 25h | 0.0180 |  | 48h | 0.0722 |
| 3al | 0.1005 |  | 26h | 0.0262 |  | 49h | 0.0452 |
| 4n | -0.3824 |  | 27h | 0.0311 |  | 50h | 0.0485 |
| 5h | 0.1293 |  | 28c | -0.2243 |  | 51c | -0.1570 |
| 6n | -0.4062 |  | 29h | 0.0228 |  | 52h | 0.0573 |
| 7h | 0.1257 |  | 30h | 0.0222 |  | 53h | 0.0486 |
| 8c | -0.0710 |  | 31c | -0.1310 |  | 54h | 0.0490 |
| 9c | -0.1541 |  | 32h | 0.0168 |  | 55c | -0.2375 |
| 10h | 0.0467 |  | 33h | 0.0278 |  | 56h | 0.0186 |
| 11h | 0.0473 |  | 34h | 0.0284 |  | 57h | 0.0273 |
| 12h | 0.0502 |  | 35al | 0.1005 |  | 58c | -0.1287 |
| 13c | -0.1591 |  | 36n | -0.3824 |  | 59h | 0.0180 |
| 14h | 0.0722 |  | 37p | 1.0312 |  | 60h | 0.0262 |
| 15h | 0.0452 |  | 38h | -0.0396 |  | 61h | 0.0311 |
| 16h | 0.0485 |  | 39h | 0.1293 |  | 62c | -0.2243 |
| 17c | -0.1570 |  | 40n | -0.4062 |  | 63h | 0.0228 |
| 18h | 0.0573 |  | 41h | 0.1257 |  | 64h | 0.0222 |
| 19h | 0.0486 |  | 42c | -0.0710 |  | 65c | -0.1310 |
| 20h | 0.0490 |  | 43c | -0.1541 |  | 66h | 0.0168 |
| 21c | -0.2375 |  | 44h | 0.0467 |  | 67h | 0.0278 |
| 22h | 0.0186 |  | 45h | 0.0473 |  | 68h | 0.0284 |
| 23h | 0.0273 |  | 46h | 0.0502 |  |  |  |

|  | **x** | **y** | **z** |
| --- | --- | --- | --- |
| p1 | -2.1471 | -0.5383 | -0.4418 |
| h2 | -2.2236 | 0.1860 | -1.6768 |
| al3 | -0.6224 | 2.2435 | 0.1457 |
| n4 | -1.5275 | 0.5828 | 0.5850 |
| h5 | -1.4298 | 0.2311 | 1.5468 |
| n6 | -1.2598 | -1.9197 | -0.5305 |
| h7 | -1.7519 | -2.7109 | -0.9653 |
| c8 | -3.9543 | -0.9428 | -0.1155 |
| c9 | -4.4456 | -1.9480 | -1.1787 |
| h10 | -3.9533 | -2.9412 | -1.0797 |
| h11 | -4.2806 | -1.5755 | -2.2155 |
| h12 | -5.5407 | -2.1156 | -1.0594 |
| c13 | -4.7487 | 0.3753 | -0.2222 |
| h14 | -4.3852 | 1.1314 | 0.5072 |
| h15 | -5.8260 | 0.1821 | -0.0142 |
| h16 | -4.6779 | 0.8214 | -1.2399 |
| c17 | -4.0720 | -1.5408 | 1.3004 |
| h18 | -3.4596 | -2.4632 | 1.4075 |
| h19 | -5.1327 | -1.8044 | 1.5170 |
| h20 | -3.7457 | -0.8130 | 2.0762 |
| c21 | -0.8750 | 2.6129 | -1.8146 |
| h22 | -0.4967 | 1.7566 | -2.4286 |
| h23 | -1.9649 | 2.6824 | -2.0570 |
| c24 | -0.1754 | 3.9064 | -2.2851 |
| h25 | -0.3122 | 4.1133 | -3.3743 |
| h26 | 0.9249 | 3.8700 | -2.1029 |
| h27 | -0.5577 | 4.8001 | -1.7390 |
| c28 | -1.1497 | 3.6765 | 1.4477 |
| h29 | -0.9647 | 3.3080 | 2.4883 |
| h30 | -0.4515 | 4.5438 | 1.3305 |
| c31 | -2.6016 | 4.1823 | 1.3344 |
| h32 | -2.8516 | 4.9815 | 2.0742 |
| h33 | -3.3372 | 3.3592 | 1.4949 |
| h34 | -2.8137 | 4.6038 | 0.3244 |
| al35 | 0.6224 | -2.2435 | -0.1457 |
| n36 | 1.5275 | -0.5828 | -0.5850 |
| p37 | 2.1471 | 0.5383 | 0.4418 |
| h38 | 2.2236 | -0.1860 | 1.6768 |
| h39 | 1.4298 | -0.2311 | -1.5468 |
| n40 | 1.2598 | 1.9197 | 0.5305 |
| h41 | 1.7519 | 2.7109 | 0.9653 |
| c42 | 3.9543 | 0.9428 | 0.1155 |
| c43 | 4.4456 | 1.9480 | 1.1787 |
| h44 | 3.9533 | 2.9412 | 1.0797 |
| h45 | 4.2806 | 1.5755 | 2.2155 |
| h46 | 5.5407 | 2.1156 | 1.0594 |
| c47 | 4.7487 | -0.3753 | 0.2222 |
| h48 | 4.3852 | -1.1314 | -0.5072 |
| h49 | 5.8260 | -0.1821 | 0.0142 |
| h50 | 4.6779 | -0.8214 | 1.2399 |
| c51 | 4.0720 | 1.5408 | -1.3004 |
| h52 | 3.4596 | 2.4632 | -1.4075 |
| h53 | 5.1327 | 1.8044 | -1.5170 |
| h54 | 3.7457 | 0.8130 | -2.0762 |
| c55 | 0.8750 | -2.6129 | 1.8146 |
| h56 | 0.4967 | -1.7566 | 2.4286 |
| h57 | 1.9649 | -2.6824 | 2.0570 |
| c58 | 0.1754 | -3.9064 | 2.2851 |
| h59 | 0.3122 | -4.1133 | 3.3743 |
| h60 | -0.9249 | -3.8700 | 2.1029 |
| h61 | 0.5577 | -4.8001 | 1.7390 |
| c62 | 1.1497 | -3.6765 | -1.4477 |
| h63 | 0.9647 | -3.3080 | -2.4883 |
| h64 | 0.4515 | -4.5438 | -1.3305 |
| c65 | 2.6016 | -4.1823 | -1.3344 |
| h66 | 2.8516 | -4.9815 | -2.0742 |
| h67 | 3.3372 | -3.3592 | -1.4949 |
| h68 | 2.8137 | -4.6038 | -0.3244 |

Compound I:

| **atom** | **charge** |  | **atom** | **charge** |  | **atom** | **charge** |
| --- | --- | --- | --- | --- | --- | --- | --- |
| 1n | -0.3941 |  | 24al | 0.1209 |  | 47h | 0.1337 |
| 2al | 0.1179 |  | 25h | 0.0334 |  | 48h | 0.1308 |
| 3n | -0.3867 |  | 26h | 0.0201 |  | 49h | 0.1279 |
| 4c | -0.1310 |  | 27h | 0.0109 |  | 50h | 0.1367 |
| 5c | -0.2299 |  | 28h | 0.0158 |  | 51h | 0.0503 |
| 6c | -0.1345 |  | 29h | 0.0267 |  | 52h | 0.0770 |
| 7c | -0.2292 |  | 30h | 0.0287 |  | 53h | 0.0426 |
| 8c | -0.1362 |  | 31h | 0.0173 |  | 54h | 0.0455 |
| 9c | -0.2406 |  | 32h | 0.0193 |  | 55h | 0.0562 |
| 10c | -0.1368 |  | 33h | 0.0304 |  | 56h | 0.0439 |
| 11c | -0.2165 |  | 34h | 0.0233 |  | 57h | 0.0421 |
| 12p | 1.0102 |  | 35h | 0.0173 |  | 58h | 0.0744 |
| 13p | 1.0186 |  | 36h | 0.0287 |  | 59h | 0.0467 |
| 14n | -0.4069 |  | 37h | 0.0235 |  | 60h | 0.0492 |
| 15n | -0.4268 |  | 38h | 0.0298 |  | 61h | 0.0777 |
| 16c | -0.0601 |  | 39h | 0.0292 |  | 62h | 0.0403 |
| 17c | -0.1685 |  | 40h | 0.0194 |  | 63h | 0.0451 |
| 18c | -0.1528 |  | 41h | 0.0305 |  | 64h | 0.0521 |
| 19c | -0.1489 |  | 42h | 0.0089 |  | 65h | 0.0459 |
| 20c | -0.0730 |  | 43h | 0.0258 |  | 66h | 0.0443 |
| 21c | -0.1617 |  | 44h | 0.0232 |  | 67h | 0.0698 |
| 22c | -0.1507 |  | 45h | -0.0356 |  | 68h | 0.0532 |
| 23c | -0.1530 |  | 46h | -0.0412 |  |  |  |

|  | **x** | **y** | **z** |
| --- | --- | --- | --- |
| n1 | -1.3310 | 0.1753 | -0.1547 |
| al2 | 0.2150 | 0.3177 | -1.3371 |
| n3 | 1.2962 | 0.0555 | 0.2541 |
| c4 | 0.6729 | 1.9731 | 3.6243 |
| c5 | -0.4079 | 1.7377 | 2.5494 |
| c6 | -1.2455 | -1.6946 | 3.7424 |
| c7 | -0.3297 | -1.6642 | 2.5011 |
| c8 | -0.4503 | -0.9651 | -3.9886 |
| c9 | 0.3592 | -1.1665 | -2.6903 |
| c10 | 1.6125 | 2.5519 | -2.8630 |
| c11 | 0.3272 | 2.1826 | -2.0967 |
| p12 | 2.8347 | 0.1311 | 0.6618 |
| p13 | -2.8440 | 0.6223 | -0.3779 |
| n14 | -3.5302 | 1.7603 | 0.7100 |
| n15 | 3.6947 | 1.6206 | 0.5402 |
| c16 | 4.0046 | -1.0864 | -0.1611 |
| c17 | 4.3061 | -0.6302 | -1.6053 |
| c18 | 5.3067 | -1.1502 | 0.6653 |
| c19 | 3.2964 | -2.4582 | -0.1687 |
| c20 | -4.1479 | -0.7316 | -0.4417 |
| c21 | -4.2108 | -1.4401 | 0.9274 |
| c22 | -5.5121 | -0.1191 | -0.8186 |
| c23 | -3.6849 | -1.7306 | -1.5235 |
| al24 | -0.2430 | 0.0492 | 1.4496 |
| h25 | 0.7116 | 1.1390 | 4.3625 |
| h26 | 0.5237 | 2.9127 | 4.2102 |
| h27 | 1.6941 | 2.0436 | 3.1781 |
| h28 | -1.4092 | 1.7339 | 3.0510 |
| h29 | -0.4314 | 2.6145 | 1.8544 |
| h30 | -0.9657 | -0.9078 | 4.4802 |
| h31 | -1.2189 | -2.6699 | 4.2869 |
| h32 | -2.3142 | -1.5103 | 3.4808 |
| h33 | -0.6000 | -2.4993 | 1.8093 |
| h34 | 0.7156 | -1.9038 | 2.8238 |
| h35 | -0.3557 | -1.8175 | -4.7045 |
| h36 | -0.1292 | -0.0489 | -4.5362 |
| h37 | -1.5404 | -0.8434 | -3.7862 |
| h38 | 0.0544 | -2.1264 | -2.2039 |
| h39 | 1.4327 | -1.3200 | -2.9645 |
| h40 | 1.6043 | 3.5890 | -3.2789 |
| h41 | 1.7988 | 1.8644 | -3.7205 |
| h42 | 2.5146 | 2.4885 | -2.2071 |
| h43 | 0.1661 | 2.9165 | -1.2689 |
| h44 | -0.5456 | 2.3289 | -2.7824 |
| h45 | 3.0104 | -0.1252 | 2.0590 |
| h46 | -3.0186 | 1.2870 | -1.6365 |
| h47 | -2.8963 | 2.5536 | 0.8904 |
| h48 | -3.8051 | 1.3512 | 1.6149 |
| h49 | 3.2478 | 2.3644 | 1.0989 |
| h50 | 3.7771 | 1.9559 | -0.4329 |
| h51 | 4.9140 | -1.4095 | -2.1189 |
| h52 | 3.3775 | -0.4898 | -2.2010 |
| h53 | 4.8956 | 0.3125 | -1.6311 |
| h54 | 6.0150 | -1.8654 | 0.1873 |
| h55 | 5.8010 | -0.1576 | 0.7280 |
| h56 | 5.1207 | -1.5108 | 1.7019 |
| h57 | 3.9744 | -3.2221 | -0.6135 |
| h58 | 2.3590 | -2.4316 | -0.7630 |
| h59 | 3.0371 | -2.7936 | 0.8604 |
| h60 | -4.9027 | -2.3110 | 0.8665 |
| h61 | -3.2128 | -1.8219 | 1.2347 |
| h62 | -4.5977 | -0.7775 | 1.7341 |
| h63 | -6.2689 | -0.9301 | -0.9267 |
| h64 | -5.8740 | 0.5958 | -0.0501 |
| h65 | -5.4659 | 0.4226 | -1.7899 |
| h66 | -4.4120 | -2.5718 | -1.5894 |
| h67 | -2.6838 | -2.1518 | -1.2888 |
| h68 | -3.6301 | -1.2552 | -2.5282 |
